# Supplementary figures and images for: A cortical disinhibitory circuit for enhancing adult plasticity
Source: eLife journal article supplement (doi:10.7554/elife.05558), 2015-01-27

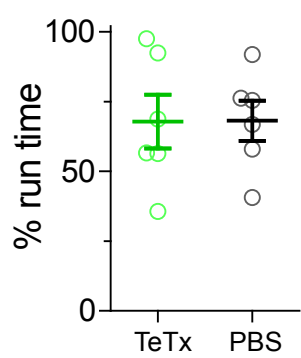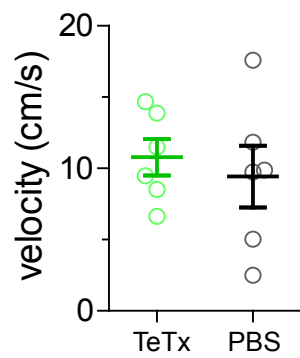

Supplement: supp [file elife-05558-supp-v1.zip]

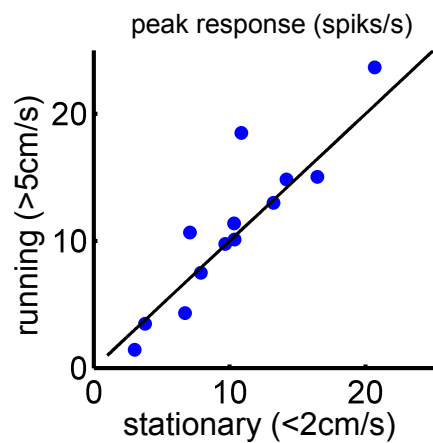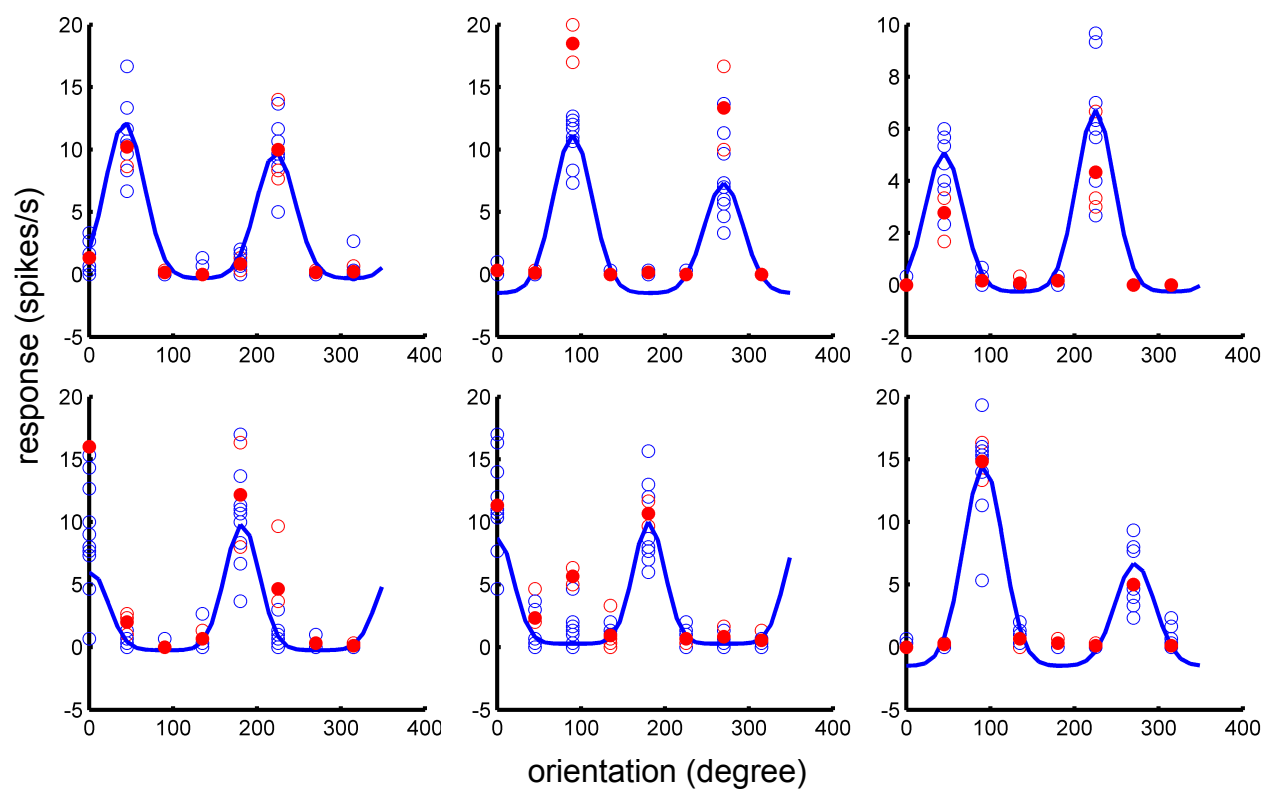

Supplement: supp [file elife-05558-supp-v1.zip]

**Figure 4 -- figure supplement 1**

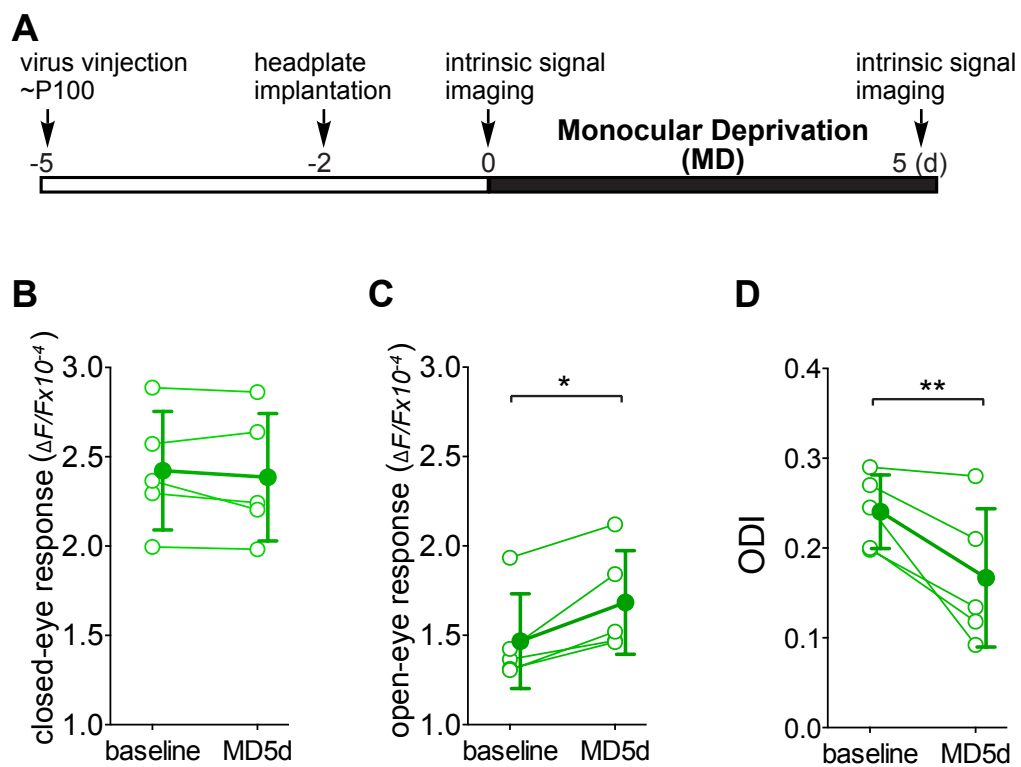

Supplement: supp [file elife-05558-supp-v1.zip]
